# Supplementary material for: Effect of polishing on the morphology of Zircaloy-4 nanostructure: formation of a novel hexagonal nanoscale pattern
Source: Royal Society of Chemistry journal article supplement (doi:10.1039/d4ra03903c), 2025-01-01
Supplement: d4ra03903c1.pdf [file d4ra03903c1.pdf]

## Supporting Information

### Effect of polishing on the morphology of Zircaloy-4 nanostructure: Formation of a novel hexagonal nanoscale pattern

Ghafar Ali<sup>1‡</sup>, Maaz Khan<sup>1</sup>, Shahzad Anwar<sup>2</sup>, Khalid M. Alotaibi<sup>3</sup>, Kashif Safeen<sup>4+</sup>, Akif Safeen<sup>5</sup>,  
Sung Oh Cho<sup>6\*</sup>

- <sup>1.</sup> Nanomaterials Research Group (NRG), Physics Division, PINSTECH, Nilore, Islamabad 44000, Pakistan
- <sup>2.</sup> Physics Department, Islamia College University, Peshawar, KPK, Pakistan.
- <sup>3.</sup> Department of Chemistry, College of Science, King Saud University, PO Box 2455, Riyadh 11541, Saudi Arabia.
- <sup>4.</sup> Department of Physics, Abdul Wali Khan University Mardan, Pakistan
- <sup>5.</sup> Department of Physics, University of Poonch Rawalakot, 12350, AJK, Pakistan.
- <sup>6.</sup> Department of Nuclear and Quantum Engineering, Korea Advanced Institute of Science and Technology (KAIST), 291 Daehak-ro, Yuseong-gu, Daejeon 34141, Republic of Korea.

\* Tel: +92-51-924801, Fax: +92-51-9248808

E-mail: [‡ghafarali@kaist.ac.kr](mailto:‡ghafarali@kaist.ac.kr)

\* [socho@kaist.ac.kr](mailto:socho@kaist.ac.kr)

+ [kashifsafeen@awkum.edu.pk](mailto:kashifsafeen@awkum.edu.pk)

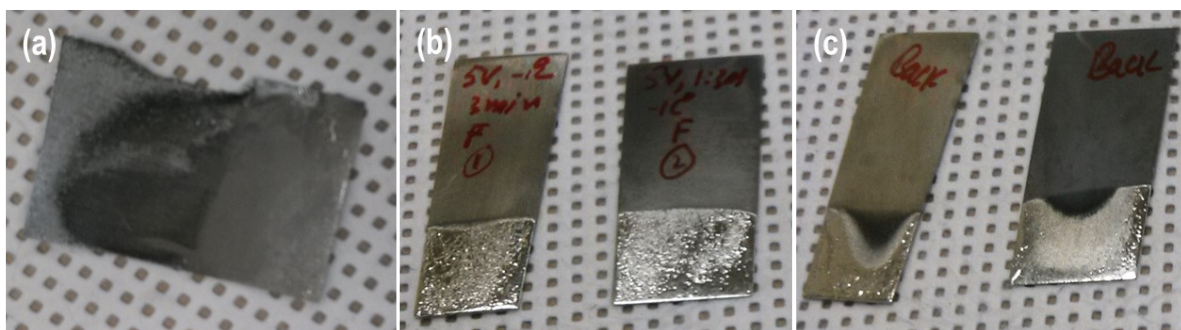

**Figure S1:** Digital picture of the electropolished Zr-4 sheet in methanol — perchloric acid, (a) dissolution of Zr-4 sheet from the edge without stirring of electrolyte, (b) front sides of the Zr-4 sheets, (c) backside of the Zr-4 sheets with continuous stirring of electrolyte. Platinum gauze was used as the counter electrode (cathode) during electropolishing.

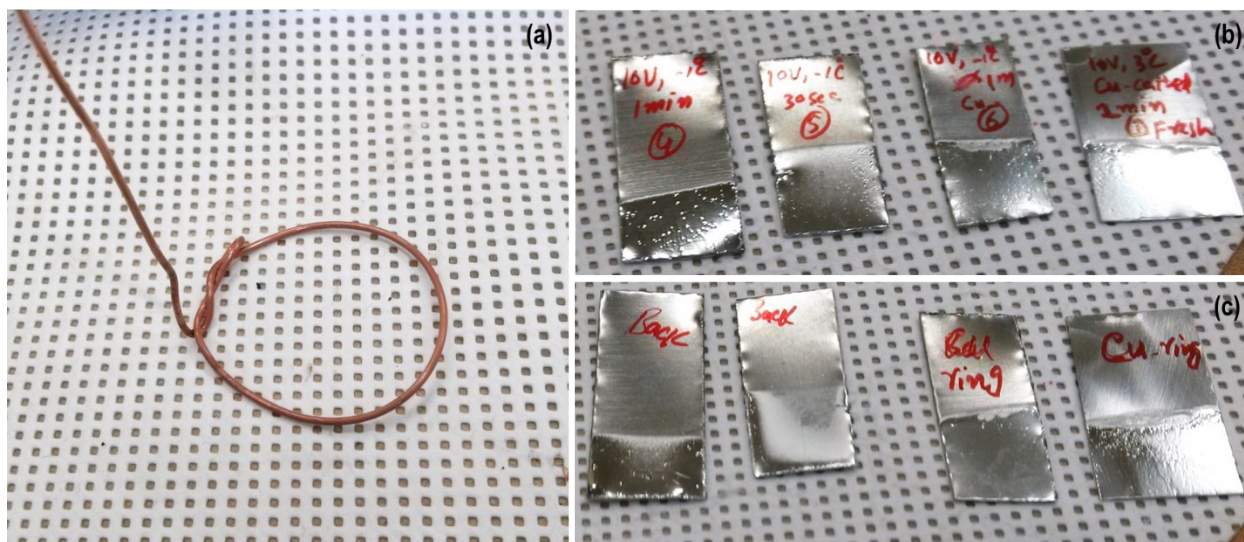

**Figure S2:** Digital pictures of (a) Cu-wire in the form of an O-ring shape, which was used as the counter electrode for uniform electric field generation during electropolishing of Zr-4 sheet in methanol — perchloric, (b) front and back sides of the electropolished Zr-4 sheets showing uniform and homogeneous surface smoothness.
